# Supplementary material for: Network model‐based screen for FDA‐approved drugs affecting cardiac fibrosis
Source: PubMed Central journal article supplement — CPT Pharmacometrics Syst Pharmacol. 2021 Feb 27;10(4):377–88. doi: 10.1002/psp4.12599 (PMC8099443; doi:10.1002/psp4.12599), 2021-02-27
Supplement: PSP4-10-377-s003.pdf [file PSP4-10-377-s003.pdf]

| <b>Drug name</b>     | <b>Binding</b>  | <b>Action</b> | <b>Target</b> |
|----------------------|-----------------|---------------|---------------|
| Bosutinib            | Non-Competitive | Antagonist    | abl           |
| Dasatinib            | Non-Competitive | Antagonist    | abl           |
| Nilotinib            | Non-Competitive | Antagonist    | abl           |
| Ponatinib            | Non-Competitive | Antagonist    | abl           |
| Benazepril           | Competitive     | Antagonist    | ACE           |
| Captopril            | Competitive     | Antagonist    | ACE           |
| Cilazapril           | Competitive     | Antagonist    | ACE           |
| Enalapril            | Competitive     | Antagonist    | ACE           |
| Fosinopril           | Competitive     | Antagonist    | ACE           |
| Lisinopril           | Competitive     | Antagonist    | ACE           |
| Moexipril            | Competitive     | Antagonist    | ACE           |
| Perindopril          | Competitive     | Antagonist    | ACE           |
| Quinapril            | Competitive     | Antagonist    | ACE           |
| Ramipril             | Competitive     | Antagonist    | ACE           |
| Rescinnamine         | Competitive     | Antagonist    | ACE           |
| Spirapril            | Competitive     | Antagonist    | ACE           |
| Trandolapril         | Competitive     | Antagonist    | ACE           |
| Arsenic trioxide     | Competitive     | Agonist       | AP1; ERK      |
| Azilsartan medoxomil | Competitive     | Antagonist    | AT1R          |
| Candesartan          | Competitive     | Antagonist    | AT1R          |
| Eprosartan           | Competitive     | Antagonist    | AT1R          |
| Forasartan           | Competitive     | Antagonist    | AT1R          |
| Irbesartan           | Competitive     | Antagonist    | AT1R          |
| Olmesartan           | Competitive     | Antagonist    | AT1R          |
| Tasosartan           | Competitive     | Antagonist    | AT1R          |
| Telmisartan          | Competitive     | Antagonist    | AT1R          |
| Valsartan            | Competitive     | Antagonist    | AT1R          |
| Losartan             | Non-Competitive | Antagonist    | AT1R          |
| Saprisartan          | Non-Competitive | Antagonist    | AT1R          |
| A.T. Globulin        | Non-Competitive | Antagonist    | B1int         |
| Arbutamine           | Competitive     | Agonist       | BAR           |
| Arformoterol         | Competitive     | Agonist       | BAR           |
| Bambuterol           | Competitive     | Agonist       | BAR           |
| Clenbuterol          | Competitive     | Agonist       | BAR           |
| Dipivefrin           | Competitive     | Agonist       | BAR           |
| Dobutamine           | Competitive     | Agonist       | BAR           |
| Droxidopa            | Competitive     | Agonist       | BAR           |
| Ephedra              | Competitive     | Agonist       | BAR           |

|                |             |            |     |
|----------------|-------------|------------|-----|
| Epinephrine    | Competitive | Agonist    | BAR |
| Fenoterol      | Competitive | Agonist    | BAR |
| Formoterol     | Competitive | Agonist    | BAR |
| Indacaterol    | Competitive | Agonist    | BAR |
| Isoetarine     | Competitive | Agonist    | BAR |
| Isoprenaline   | Competitive | Agonist    | BAR |
| Norepinephrine | Competitive | Agonist    | BAR |
| Olodaterol     | Competitive | Agonist    | BAR |
| Orciprenaline  | Competitive | Agonist    | BAR |
| Pirbuterol     | Competitive | Agonist    | BAR |
| Procaterol     | Competitive | Agonist    | BAR |
| Ritodrine      | Competitive | Agonist    | BAR |
| Salbutamol     | Competitive | Agonist    | BAR |
| Salmeterol     | Competitive | Agonist    | BAR |
| Terbutaline    | Competitive | Agonist    | BAR |
| Vilanterol     | Competitive | Agonist    | BAR |
| Acebutolol     | Competitive | Antagonist | BAR |
| Alprenolol     | Competitive | Antagonist | BAR |
| Atenolol       | Competitive | Antagonist | BAR |
| Betaxolol      | Competitive | Antagonist | BAR |
| Bevantolol     | Competitive | Antagonist | BAR |
| Bisoprolol     | Competitive | Antagonist | BAR |
| Bopindolol     | Competitive | Antagonist | BAR |
| Bupranolol     | Competitive | Antagonist | BAR |
| Carteolol      | Competitive | Antagonist | BAR |
| Carvedilol     | Competitive | Antagonist | BAR |
| Celiprolol     | Competitive | Antagonist | BAR |
| Esmolol        | Competitive | Antagonist | BAR |
| Labetalol      | Competitive | Antagonist | BAR |
| Levobunolol    | Competitive | Antagonist | BAR |
| Metipranolol   | Competitive | Antagonist | BAR |
| Metoprolol     | Competitive | Antagonist | BAR |
| Nadolol        | Competitive | Antagonist | BAR |
| Nebivolol      | Competitive | Antagonist | BAR |
| Oxprenolol     | Competitive | Antagonist | BAR |
| Penbutolol     | Competitive | Antagonist | BAR |
| Pindolol       | Competitive | Antagonist | BAR |
| Practolol      | Competitive | Antagonist | BAR |
| Propranolol    | Competitive | Antagonist | BAR |

|                         |                 |            |                                   |
|-------------------------|-----------------|------------|-----------------------------------|
| Sotalol                 | Competitive     | Antagonist | BAR                               |
| Timolol                 | Competitive     | Antagonist | BAR                               |
| Amiodarone              | Non-Competitive | Antagonist | BAR                               |
| Amyl Nitrite            | Non-Competitive | Agonist    | cGMP                              |
| Erythrityl Tetranitrate | Non-Competitive | Agonist    | cGMP                              |
| Isosorbide Dinitrate    | Non-Competitive | Agonist    | cGMP                              |
| Nitroglycerin           | Non-Competitive | Agonist    | cGMP                              |
| Nitroprusside           | Non-Competitive | Agonist    | cGMP                              |
| Ocriplasmin             | Non-Competitive | Antagonist | EDAFN                             |
| Ambrisentan             | Competitive     | Antagonist | ETAR                              |
| Bosentan                | Competitive     | Antagonist | ETAR                              |
| Maitentan               | Competitive     | Antagonist | ETAR                              |
| Sitaxentan              | Competitive     | Antagonist | ETAR                              |
| Tocilizumab             | Competitive     | Antagonist | gp130                             |
| Canakinumab             | Competitive     | Antagonist | IL1                               |
| Gallium nitrate         | Non-Competitive | Antagonist | IL1                               |
| Anakinra                | Competitive     | Antagonist | IL1R1                             |
| Siltuximab              | Competitive     | Antagonist | IL6                               |
| Cobimetinib             | Competitive     | Antagonist | MEK1                              |
| Trametinib              | Non-Competitive | Antagonist | MEK1                              |
| Marimastat              | Competitive     | Antagonist | MMP1; MMP2; MMP9; MMP14           |
| Glucosamine             | Non-Competitive | Antagonist | MMP9                              |
| Triflusal               | Non-Competitive | Antagonist | NFKB                              |
| Thalidomide             | Non-Competitive | Antagonist | NFKB; TNFa                        |
| Sacubitril              | Non-Competitive | Agonist    | NP                                |
| Entresto                | Competitive     | Both       | NPRA (Agonist); AT1R (Antagonist) |
| Urokinase               | Non-Competitive | Antagonist | PAI1                              |
| Becaplermin             | Competitive     | Antagonist | PDGFR                             |
| Pazopanib               | Non-Competitive | Antagonist | PDGFR                             |
| Sunitinib               | Non-Competitive | Antagonist | PDGFR                             |
| Sorafenib               | Non-Competitive | Antagonist | PDGFR; Raf                        |
| Regorafenib             | Non-Competitive | Antagonist | PDGFR; Raf; abl                   |
| Dabrafenib              | Non-Competitive | Antagonist | Raf                               |
| Fasudil                 | Competitive     | Antagonist | ROCK                              |
| Ripasudil               | Competitive     | Antagonist | ROCK                              |
| Galunisertib            | Non-Competitive | Antagonist | TGFB1R                            |
| Lucanix                 | Competitive     | Antagonist | TGFBmRNA                          |
| Trabedersen             | Competitive     | Antagonist | TGFBmRNA                          |
| Adalimumab              | Non-Competitive | Antagonist | TNF                               |

|                    |                 |            |              |
|--------------------|-----------------|------------|--------------|
| Certolizumab pegol | Non-Competitive | Antagonist | TNF          |
| Infliximab         | Non-Competitive | Antagonist | TNF          |
| Pomalidomide       | Non-Competitive | Antagonist | TNF          |
| Etanercept         | Competitive     | Antagonist | TNF $\alpha$ |
| Golimumab          | Competitive     | Antagonist | TNF $\alpha$ |
